# Supplementary material for: Sr-Nd-Hf Isotopic Disequilibrium During the Partial Melting of Metasediments: Insight From Himalayan Leucosome
Source: Frontiers journal article supplement (doi:10.3389/feart.2022.891960), 2022-05-05
Supplement: Data_Sheet_1.XLSX [file Data_Sheet_1.XLSX]

## Sheet: Sheet1
Table S1 U-(Th)-Pb dating of standard samples
Sample name	Th/U	Isotopic Ratios								Age (Ma)
		207Pb/206Pb	± s	207Pb/235U	± s	206Pb/238U	± s	208Pb/232Th	± s	207Pb/206Pb	± s	207Pb/235U	± s	206Pb/238U	± s
91500	0.327693	0.07463	0.00115	1.83594	0.02593	0.17845	0.00196	0.05331	0.00127	1058.2	31.15	1058.4	9.29	1058.5	10.7
91500	0.333469	0.0756	0.00121	1.86812	0.02736	0.17925	0.00202	0.05354	0.00136	1084.5	31.84	1069.9	9.69	1062.9	11.05
91500	0.331145	0.07448	0.00137	1.85975	0.03131	0.18111	0.00223	0.05313	0.00156	1054.3	36.9	1066.9	11.12	1073.1	12.18
91500	0.339674	0.07514	0.00125	1.9552	0.02966	0.18875	0.00218	0.05008	0.00143	1072.3	32.95	1100.2	10.19	1114.6	11.84
91500	0.334639	0.07033	0.00116	1.77244	0.0269	0.18282	0.00202	0.05502	0.00133	937.9	33.36	1035.4	9.85	1082.3	11.03
91500	0.329252	0.07476	0.00112	1.84621	0.02543	0.17914	0.00188	0.05459	0.00128	1062	29.87	1062.1	9.07	1062.3	10.3
91500	0.334567	0.0755	0.00275	1.87279	0.06277	0.1802	0.00386	0.05107	0.00314	1081.8	71.43	1071.5	22.18	1068.1	21.08
91500	0.333494	0.07423	0.00227	1.85427	0.05228	0.18146	0.00332	0.05463	0.00275	1047.8	60.49	1065	18.6	1074.9	18.1
91500	0.337886	0.06952	0.0021	1.73733	0.04887	0.18151	0.0031	0.05316	0.00243	914.3	60.93	1022.5	18.13	1075.2	16.9
91500	0.338475	0.07331	0.00253	1.83647	0.05841	0.18195	0.00366	0.05314	0.00295	1022.5	68.2	1058.6	20.91	1077.6	19.94
91500	0.33094	0.07719	0.00205	1.86752	0.04564	0.1757	0.00284	0.05362	0.00248	1126.1	52.04	1069.7	16.16	1043.4	15.58
91500	0.327782	0.07425	0.00217	1.81773	0.04894	0.17779	0.0031	0.05363	0.00251	1048.2	57.84	1051.9	17.64	1054.9	16.96
91500	0.336786	0.07344	0.00217	1.84018	0.05048	0.18194	0.00312	0.05469	0.00259	1026.1	58.71	1059.9	18.05	1077.6	17.01
91500	0.345077	0.07346	0.00309	1.83354	0.07113	0.18124	0.00435	0.05705	0.0037	1026.6	82.71	1057.6	25.49	1073.7	23.72
91500	0.326866	0.07129	0.00215	1.77157	0.0499	0.1804	0.00306	0.05842	0.0026	965.9	60.5	1035.1	18.28	1069.1	16.72
91500	0.336924	0.07087	0.0025	1.73391	0.05652	0.17762	0.00356	0.0563	0.00298	953.6	70.4	1021.2	20.99	1054	19.5
91500	0.338492	0.07685	0.00247	1.89218	0.05603	0.17873	0.00336	0.05545	0.00276	1117.2	62.74	1078.3	19.67	1060	18.35
91500	0.338498	0.07466	0.00292	1.85074	0.06671	0.17992	0.00404	0.05198	0.00328	1059.1	76.99	1063.7	23.76	1066.6	22.08
91500	0.336506	0.07581	0.00228	1.86665	0.05163	0.17871	0.00321	0.05428	0.00263	1090	59.04	1069.3	18.29	1059.9	17.56
91500	0.345704	0.07558	0.00264	1.86606	0.06017	0.17919	0.00364	0.05421	0.00296	1083.9	68.52	1069.1	21.32	1062.6	19.92
91500	0.337008	0.07519	0.00217	1.86169	0.04972	0.17968	0.00306	0.05343	0.00253	1073.5	56.94	1067.6	17.64	1065.2	16.72
91500	0.337912	0.07357	0.00221	1.81421	0.05057	0.17895	0.00308	0.05171	0.00244	1029.6	59.53	1050.6	18.25	1061.3	16.84
91500	0.340658	0.07266	0.00235	1.81208	0.05426	0.18096	0.00343	0.05353	0.00279	1004.3	64.4	1049.8	19.59	1072.2	18.72
91500	0.335579	0.06951	0.00212	1.75006	0.04986	0.18268	0.0031	0.05622	0.00258	913.9	61.51	1027.2	18.41	1081.6	16.89
91500	0.334009	0.07669	0.0026	1.88415	0.05894	0.17822	0.0035	0.05429	0.00302	1113.2	66.15	1075.5	20.75	1057.2	19.17
91500	0.340456	0.075	0.0025	1.85478	0.05719	0.17941	0.00345	0.055	0.00295	1068.4	65.6	1065.1	20.34	1063.7	18.84
SA01	1.63604	0.09246	0.00179	1.24026	0.02112	0.09731	0.00127	0.03487	0.00051	1476.6	36.45	819	9.57	598.6	7.46
SA01	1.63378	0.0576	0.00095	0.70962	0.01072	0.08937	0.00093	0.02831	0.00033	514.3	36.26	544.5	6.37	551.8	5.53
SA01	1.64516	0.05711	0.00124	0.71994	0.01438	0.09144	0.00112	0.02682	0.00039	495.3	47.79	550.6	8.49	564	6.63
SA01	1.63187	0.05753	0.00094	0.70731	0.01062	0.08918	0.00092	0.02794	0.00032	511.6	36.04	543.1	6.32	550.7	5.47
SA01	1.59354	0.06085	0.00131	0.71975	0.01418	0.0858	0.00106	0.02739	0.0004	634	45.75	550.5	8.37	530.6	6.29
SA01	1.68987	0.05849	0.00201	0.69975	0.02214	0.08691	0.0015	0.02643	0.00057	548.1	73.31	538.6	13.23	537.2	8.92
SA01	1.73621	0.05516	0.00186	0.67734	0.02112	0.08919	0.00151	0.02704	0.00056	418.5	73.28	525.2	12.78	550.8	8.97
SA01	1.59718	0.05748	0.00176	0.69068	0.01957	0.08727	0.00135	0.02748	0.00053	509.4	66.39	533.2	11.75	539.3	8.02
SA01	1.62396	0.05455	0.00208	0.66364	0.02343	0.08834	0.00162	0.02774	0.00064	393.7	82.52	516.8	14.3	545.7	9.57
SA01	1.67715	0.05533	0.00213	0.65066	0.02319	0.08537	0.00159	0.02657	0.00062	425.5	83.49	508.9	14.26	528.1	9.42
SA01	1.67452	0.05605	0.00186	0.68075	0.02095	0.08816	0.00144	0.0278	0.00056	454.1	72.07	527.2	12.66	544.6	8.51
SA01	1.60224	0.05666	0.00178	0.67825	0.01971	0.08687	0.00138	0.0277	0.00056	477.7	68.76	525.7	11.92	537	8.17
SA01	1.71722	0.05726	0.00191	0.69546	0.02134	0.08813	0.00148	0.02774	0.00058	501.2	72.14	536.1	12.78	544.5	8.77
SA01	1.62036	0.05767	0.00227	0.69413	0.02523	0.08732	0.00169	0.02748	0.00069	517.1	84.59	535.3	15.12	539.7	10.05
SA01	1.72666	0.05897	0.00201	0.70029	0.02191	0.08614	0.00151	0.02685	0.00059	566.2	72.61	539	13.08	532.7	8.96
