# Supplementary material for: Sr-Nd-Hf Isotopic Disequilibrium During the Partial Melting of Metasediments: Insight From Himalayan Leucosome
Source: Frontiers journal article supplement (doi:10.3389/feart.2022.891960), 2022-05-05
Supplement: Data_Sheet_2.XLSX [file Data_Sheet_2.XLSX]

## Sheet: Sheet1
Table S2 Isotopic compositions of the USGC standards
Standard /isotopes	87Sr/86Sr	143Nd/144Nd	176Hf/177Hf
BCR-2
Measured	0.705065		0.282861
Recommended	0.705013		0.282841
AGV-2
Measured	0.704012	0.51279	0.282977
Recommended	0.703981	0.512791	0.282984
BHVO-2
Measured	0.703514	0.512984	0.283086
Recommended	0.703479	0.512984	0.283105
STM-2
Measured	0.703699	0.512917	0.283016
Recommended	0.703701	0.512913	0.283021
W-2
Measured	0.706987	0.512525
Recommended	0.70695	0.512913
