# Supplementary material for: Sr-Nd-Hf Isotopic Disequilibrium During the Partial Melting of Metasediments: Insight From Himalayan Leucosome
Source: Frontiers journal article supplement (doi:10.3389/feart.2022.891960), 2022-05-05
Supplement: Data_Sheet_3.XLSX [file Data_Sheet_3.XLSX]

## Sheet: Sheet1
Table S3 Results of zircon U-(Th)-Pb dating of the leucosome in the Nyalam.
Sample name	Spot name	Position	Th/U	Isotopic Ratios								Age (Ma)
				207Pb/206Pb	± 1s	207Pb/235U	± 1s	206Pb/238U	± 1s	208Pb/232Th	± 1s	207Pb/206Pb	± 1s	207Pb/235U	± 1s	206Pb/238U	± 1s
16YL08-1L	YL08C11	Core	0.548308	0.16092	0.00139	9.5925	0.07597	0.43264	0.00427	0.11973	0.00179	2465	8	2396	7	2318	19
16YL08-1L	YL08C1	Core	1.08283	0.10237	0.00196	3.80557	0.06722	0.26988	0.00387	0.09	0.00172	1668	15	1594	14	1540	20
16YL08-1L	YL08C2	Core	0.774517	0.068	0.00121	1.41534	0.02291	0.1511	0.00181	0.04953	0.0009	869	16	895	10	907	10
16YL08-1L	YL08C3	Core	1.4914	0.06776	0.00108	1.26599	0.01826	0.13563	0.0015	0.04311	0.00056	861	14	831	8	820	9
16YL08-1L	YL08C4	Core	0.49261	0.05368	0.00077	0.5353	0.00694	0.07239	0.00072	0.0247	0.0004	358	14	435	5	451	4
16YL08-1L	YL08C6	Core	0.0201345	0.05538	0.00054	0.55468	0.00477	0.0727	0.00063	0.02454	0.00118	428	9	448	3	452	4
16YL08-1L	YL08C8	Core	0.475838	0.05534	0.00097	0.49696	0.00788	0.06518	0.00071	0.02132	0.00043	426	18	410	5	407	4
16YL08-1L	YL08C9	Core	0.726078	0.06842	0.00196	1.21943	0.03176	0.12935	0.00215	0.04239	0.00123	881	28	810	15	784	12
16YL08-1L	YL08C10	Core	0.897813	0.05605	0.00057	0.59702	0.0054	0.07731	0.00068	0.02356	0.00025	454	9	475	3	480	4
16YL08-1L	YL08R1	Core	0.0728716	0.05523	0.0006	0.57943	0.00568	0.07617	0.00069	0.02389	0.00071	422	10	464	4	473	4
16YL08-1L	YL08R2	Core	0.0589995	0.05524	0.00053	0.58258	0.00492	0.07657	0.00067	0.02189	0.00064	422	9	466	3	476	4
16YL08-1L	YL08R3	Core	0.116426	0.0555	0.00064	0.56928	0.0059	0.07447	0.00069	0.02261	0.00059	432	10	458	4	463	4
16YL08-1L	YL08R4	Core	0.0503813	0.05495	0.00056	0.55175	0.00504	0.07291	0.00065	0.02491	0.00078	410	9	446	3	454	4
16YL08-1L	YL08R5	Core	0.0344609	0.05534	0.00047	0.57904	0.0043	0.07597	0.00064	0.0236	0.00073	426	8	464	3	472	4
16YL08-1L	YL08R10	Core	0.0305869	0.0547	0.00064	0.57274	0.00604	0.07602	0.0007	0.02885	0.00129	400	11	460	4	472	4
16YL08-1L	YL08R11	Core	0.0355216	0.0557	0.00051	0.55289	0.00452	0.07205	0.00062	0.023	0.00077	440	9	447	3	448	4
16YL08-1L	YL08R12	Core	0.0175743	0.05492	0.0007	0.47573	0.00446	0.06282	0.00054	0.01961	0.00018	409	29	395	3	393	3
16YL08-1L	YL08R13	Core	0.0900486	0.05453	0.00071	0.57845	0.00678	0.07701	0.00073	0.02441	0.00079	393	12	463	4	478	4
16YL08-1L	YL08R16	Core	0.0234066	0.05505	0.00051	0.55467	0.00457	0.07314	0.00063	0.02423	0.00099	414	9	448	3	455	4
16YL09L	YL09C1	Core	0.537144	0.05053	0.00059	0.26402	0.00279	0.0379	0.00034	0.01194	0.00015	219	11	238	2	240	2
16YL09L	YL09C4	Core	0.00618517	0.05393	0.00052	0.23198	0.00133	0.0312	0.00024	0.00976	9e-05	368	22	212	1	198	2
16YL09L	YL09C5	Core	0.0363993	0.05572	0.00054	0.56057	0.00335	0.07297	0.00056	0.02273	0.0002	441	22	452	2	454	3
16YL09L	YL09C8	Core	0.0105453	0.05312	0.00056	0.15559	0.00112	0.02125	0.00016	0.00666	5e-05	334	25	147	1	136	1
16YL09L	YL09C9	Core	0.0963004	0.05623	0.0004	0.5659	0.00344	0.073	0.00059	0.0245	0.00033	461	8	455	2	454	4
16YL09L	YL09C10	Core	0.649105	0.05652	0.00053	0.48594	0.00397	0.06237	0.00053	0.02196	0.00022	473	8	402	3	390	3
16YL09L	YL09C11	Core	0.476032	0.06173	0.001	0.83842	0.01167	0.09851	0.00081	0.03032	0.00024	665	35	618	6	606	5
16YL09L	YL09R3	Core	0.0729299	0.05974	0.00037	0.55019	0.00283	0.0668	0.00053	0.04287	0.00047	594	9	445	2	417	3
16YL09L	YL09R6	Core	0.988513	0.06136	0.00103	1.10237	0.0169	0.13033	0.00141	0.03907	0.00058	652	16	754	8	790	8
16YL09L	YL09R8	Core	1.34619	0.05172	0.00116	0.13078	0.00271	0.01834	0.00021	0.00564	8e-05	273	27	125	2	117	1
16YL09L	YL09R9	Core	0.00580502	0.05306	0.0007	0.16733	0.00169	0.02287	0.00019	0.00717	9e-05	331	31	157	1	146	1
16YL09L	YL09R10	Core	0.0212849	0.05594	0.00064	0.44129	0.0035	0.05722	0.00047	0.01782	0.00017	450	26	371	2	359	3
16YL09L	YL09R16	Core	0.414302	0.05053	0.0006	0.24945	0.00265	0.03581	0.00032	0.01127	0.00016	219	11	226	2	227	2
16YL13L	YL13C1	Core	0.325301	0.05868	0.00054	0.71122	0.00578	0.08796	0.00076	0.03719	0.00045	555	8	545	3	543	5
16YL13L	YL13C3	Core	0.566878	0.05546	0.00042	0.56665	0.00377	0.07414	0.00061	0.02385	0.00023	431	8	456	2	461	4
16YL13L	YL13C4	Core	0.49264	0.05577	0.0006	0.52164	0.00504	0.06788	0.00061	0.02083	0.00028	443	10	426	3	423	4
16YL13L	YL13C6	Core	0.0723157	0.05512	0.00045	0.53275	0.00382	0.07013	0.00058	0.02496	0.00049	417	8	434	3	437	3
16YL13L	YL13C7	Core	0.411897	0.05666	0.00149	0.28735	0.00686	0.0368	0.00051	0.02329	0.00055	478	29	256	5	233	3
16YL13L	YL13C8	Core	0.0608798	0.05488	0.00038	0.53548	0.00318	0.07081	0.00057	0.02497	0.0004	407	9	435	2	441	3
16YL13L	YL13C9	Core	1.75385	0.0564	0.0012	0.30987	0.00594	0.03987	0.00048	0.00924	0.00015	468	22	274	5	252	3
16YL13L	YL13C10	Core	0.0269196	0.05391	0.00061	0.40137	0.00319	0.054	0.00044	0.01689	0.00016	367	26	343	2	339	3
16YL13L	YL13C11	Core	0.468789	0.05626	0.00185	0.41128	0.01229	0.05304	0.00089	0.02224	0.00074	463	37	350	9	333	5
16YL13L	YL13R1	Core	0.0984531	0.05446	0.00077	0.40528	0.00518	0.05401	0.00053	0.02285	0.00068	390	13	345	4	339	3
16YL13L	YL13R2	Core	0.0585782	0.05481	0.00057	0.52473	0.00484	0.06947	0.00061	0.03285	0.00083	404	9	428	3	433	4
16YL13L	YL13R3	Core	0.0350064	0.05444	0.00075	0.41416	0.00443	0.05518	0.00049	0.01724	0.00016	389	32	352	3	346	3
16YL13L	YL13R7	Core	0.245539	0.05493	0.00058	0.50125	0.00472	0.06622	0.00058	0.02318	0.00037	409	9	413	3	413	4
16YL13L	YL13R9	Core	0.0178426	0.05484	0.00071	0.40469	0.00383	0.05352	0.00047	0.0167	0.00015	406	29	345	3	336	3
16YL13L	YL13R14	Core	0.0435564	0.05448	0.00073	0.40977	0.00493	0.05457	0.00052	0.02404	0.00099	391	12	349	4	343	3
16YL13L	YL13R17	Core	0.0547258	0.05491	0.00131	0.24498	0.00528	0.03237	0.00042	0.02041	0.00114	409	26	222	4	205	3
16YL13L	YL13R18	Core	0.239183	0.0541	0.00077	0.389	0.00502	0.05216	0.00051	0.03184	0.00055	375	14	334	4	328	3
16YL16LB	YL16C2	Core	1.17675	0.05702	0.00183	0.45127	0.01317	0.05749	0.00095	0.02119	0.00047	492	36	378	9	360	6
16YL16LB	YL16C3	Core	0.632011	0.06738	0.00217	1.26442	0.03727	0.13631	0.00246	0.04371	0.00151	850	33	830	17	824	14
16YL16LB	YL16C5	Core	0.354519	0.05445	0.00134	0.53318	0.01218	0.07112	0.00091	0.024	0.00071	390	29	434	8	443	5
16YL16LB	YL16C7	Core	0.741104	0.05601	0.00131	0.60702	0.01301	0.07871	0.00103	0.02464	0.00054	453	25	482	8	488	6
16YL16LB	YL16C8	Core	0.640681	0.06331	0.00123	1.02755	0.01811	0.11788	0.00145	0.04041	0.00081	719	18	718	9	718	8
16YL16LB	YL16C9	Core	0.249957	0.05626	0.00167	0.5993	0.01641	0.07737	0.00118	0.0235	0.00111	463	34	477	10	480	7
16YL16LB	YL16R3	Rim	0.00903439	0.0477	0.00196	0.0138	0.00051	0.0021	4e-05	0.00067	0.00015	306.2	83.98	13.9	0.5	13.5	0.2
16YL16LB	YL16R10	Rim	0.0124028	0.04605	0.00079	0.01509	0.00019	0.00238	3e-05	0.00164	0.00054	214.4	69.59	15.2	0.2	15.3	0.2
16YL16LB	YL16R4	Rim	0.00585669	0.04625	0.00183	0.01409	0.00051	0.00221	4e-05	0.00242	0.0006	10.8	92.63	14.2	0.5	14.2	0.3
16YL16LB	YL16R5	Rim	0.0171882	0.04726	0.00124	0.01423	0.00032	0.00218	3e-05	0.00069	3e-05	179.4	53.56	14.3	0.3	14.1	0.2
16YL16LB	YL16R6	Rim	0.0163674	0.04605	0.00132	0.01389	0.00032	0.00219	4e-05	0.00125	0.0005	367.8	90.8	14	0.3	14.1	0.2
16YL16LB	YL16R7	Rim	0.0123167	0.04457	0.00128	0.01372	0.00037	0.00224	3e-05	0.00102	0.00021	0.1	0	13.8	0.4	14.4	0.2
16YL16LB	YL16R8	Rim	0.0179738	0.04647	0.00122	0.01462	0.00035	0.00228	3e-05	0.00103	0.00013	22.1	61.06	14.7	0.4	14.7	0.2
16YL16LB	YL16R9	Rim	0.014284	0.04679	0.00125	0.01452	0.00036	0.00225	3e-05	0.00079	0.00016	38.2	63.01	14.6	0.4	14.5	0.2
16YL16LB	YL16R11	Rim	0.0150035	0.04826	0.00126	0.0148	0.00035	0.00223	3e-05	0.00101	0.00016	112	60.26	14.9	0.4	14.4	0.2
16YL16LB	YL16R12	Rim	0.0133712	0.04627	0.00128	0.01416	0.00036	0.00222	3e-05	0.00119	0.00021	11.6	64.6	14.3	0.4	14.3	0.2
16YL16LB	YL16R13	Rim	0.0162065	0.0467	0.00137	0.01442	0.00039	0.00224	3e-05	0.00111	0.00017	33.6	68.76	14.5	0.4	14.4	0.2
16YL16LB	YL16R14	Rim	0.0168129	0.04605	0.00086	0.01399	0.00019	0.0022	3e-05	0.00113	0.00027	131.8	63.61	14.1	0.2	14.2	0.2
16YL16LB	YL16R15	Rim	0.0167796	0.0446	0.00111	0.01402	0.00032	0.00228	3e-05	0.00099	0.00014	0.1	0	14.1	0.3	14.7	0.2
16YL16LB	YL16R16	Rim	0.0104542	0.04594	0.00164	0.01446	0.00048	0.00229	4e-05	0.00091	0.00026	0.1	77.59	14.6	0.5	14.7	0.3
