# Supplementary material for: Sr-Nd-Hf Isotopic Disequilibrium During the Partial Melting of Metasediments: Insight From Himalayan Leucosome
Source: Frontiers journal article supplement (doi:10.3389/feart.2022.891960), 2022-05-05
Supplement: Data_Sheet_4.XLSX [file Data_Sheet_4.XLSX]

## Sheet: Sheet1
Table S4 Whole rock Sr-Nd-Hf isotopic compositions of schist, leucosome and leucogranite in the Nyalam
sample name	Sample type	Age(Ma)	Zr (ppm)	Th (ppm)	U (ppm)	P2O5 (wt.%)	Rb(ppm)	Sr(ppm)	Sm(ppm)	Nd(ppm)	Lu(ppm)	Hf(ppm)	Tzir(oC)	Tmnz (oC)	87Sr/86Sr	1 s	87Rb/86Sr	87Sr/86Sri	143Nd/144Nd	1 s	147Sm/144Nd	143Nd/144Nd(t)	εNd(t)a	176Hf/177Hf	1 s	176Lu/177Hf	176Hf/177Hf(t)	εHf(t)b
16YL14	Schist	15	269.271	16	2.15	0.0546	98	210	6.26527	34	0.296741	7.1			0.729312	3.5e-06	1.35287	0.729029	0.51169	2.2e-06	0.111348	0.511679	-18.3	0.281965	1.9e-06	0.00595839	0.281963	-28.7386
16YL08-1L	Leucosome	15.8	5.9452	0.8	1.43	0.1403	345	92	1.00254	3.3	0.106918	0.3	614	562	0.811751	6.3e-06	10.9595	0.809292	0.512022	3e-06	0.183572	0.512003	-11.9903	0.282497	3.1e-06	0.0508089	0.282482	-9.92336
16YL08-2L	Leucosome	15.8	28.4566	0.42	2.2	0.2681	280	76	1.92304	5.2	0.229305	1.4	630	655	0.813365	4.9e-06	10.7689	0.810949	0.511974	5e-06	0.223463	0.511951	-13.009	0.282447	1.8e-06	0.0233504	0.28244	-11.3839
16YL09L	Leucosome	14.3	5.17536	0.437777	2.5	0.2153	320	69	1.44167	4.4	0.123226	0.3	637	560	0.831493	3.9e-06	13.5799	0.828736	0.512022	3e-06	0.197985	0.512004	-12.0152	0.282654	3.3e-06	0.0585587	0.282638	-4.42672
16YL10L	Leucosome	15	20.8717	1.2	12.3	0.2075	325	54	1.46249	4.6	0.247626	1	637	639	0.879092	3.3e-06	17.705	0.875321	0.512044	5.4e-06	0.192112	0.512025	-11.5846	0.282579	3e-06	0.0353026	0.282569	-6.85341
16YL11L	Leucosome	15	9.56572	4.5	28.6	0.1648	285	79	1.91761	6.9	0.133414	0.4	663	593	0.799825	4.5e-06	10.5311	0.797582	0.511985	2.8e-06	0.167931	0.511968	-12.6893	0.282497	5e-06	0.04755	0.282484	-9.87115
16YL16L-B	Leucosome	15	25.2235	2.5	1.5	0.1358	251	124	1.36854	5	0.232354	0.8	657	653	0.764503	4.9e-06	5.8885	0.763248	0.511884	4.4e-06	0.165389	0.511868	-14.6411	0.28235	3e-06	0.0414066	0.282338	-15.0161
15NL03-1	Leucogranite	16.3	39.7857	2.01192	2.43788	0.1451	182.627	86.8893	1.45335	4.24446	0.166069	1.63224	690.715	653.705	0.76052	6e-06	6.11197	0.759105	0.511851	5e-06	0.206904	0.511829	-15.3764	0.282304	2.3e-06	0.0145048	0.282299	-16.3639
15NL05-1-1	Leucogranite	17.6	66.509	11.2481	5.36272	0.2342	439.401	72.3963	3.37654	13.5098	0.121049	2.24258	731.84	739.802	0.770143	7e-06	17.666	0.765727	0.511862	5e-06	0.151023	0.511844	-15.0381	0.282265	2.1e-06	0.00769523	0.282262	-17.6374
15NL05-1-2	Leucogranite	17.6	72.7974	10.8667	5.24686	0.2516	440.115	70.0805	3.38743	12.799	0.124949	2.47851	739.742	738.943	0.77018	6e-06	18.2795	0.765611	0.511856	4.5e-06	0.159924	0.511837	-15.1751	0.282268	1.8e-06	0.00718706	0.282265	-17.5325
15NL05-2	Leucogranite	17.6	44.43	3.73	6.86	0.2056	378.92	65.51	1.83	6.03	0.21	1.55	701.243	681.3	0.762908	3.9e-06	16.8238	0.758703	0.511862	2.4e-06	0.183381	0.511841	-15.112	0.282293	3.2e-06	0.0193151	0.282286	-16.7929
15NL06-1	Leucogranite	17.6	60.933	9.93204	6.02039	0.1692	403	66	2.92766	11.0725	0.104274	2.27907	721.818	721.674	0.769087	3.7e-06	17.7709	0.764645	0.511869	5.5e-06	0.15977	0.51185	-14.9212	0.282323	2.3e-06	0.0065227	0.282321	-15.5549
15NL07-1	Leucogranite	15.8	31.457	3.24757	4.88501	0.1821	292.568	104.216	1.68278	5.73343	0.169241	1.10452	670.72	667.224	0.758194	7e-06	8.16164	0.756363	0.511817	5.5e-06	0.177351	0.511799	-15.9794	0.282243	2e-06	0.0218445	0.282236	-18.5934
15NL08-1	Leucogranite	20	13.5574	0.898236	1.45803	0.2406	644.95	42.1008	0.692472	2.17634	0.0575686	0.75404	612.634	599.334	0.759866	7e-06	44.5441	0.747214	0.511863	4.5e-06	0.192263	0.511838	-15.1099
15NL08-2	Leucogranite	20	17.0364	1.08883	1.32988	0.3055	593.369	44.463	1.14287	3.32998	0.0940319	0.89252	626.38	624.023	0.758643	4.3e-06	38.7997	0.747623	0.511843	6e-06	0.207385	0.511816	-15.5387	0.282311	2.7e-06	0.0150199	0.282306	-16.0529
15NL08-3	Leucogranite	20	37.4043	5.37817	2.73351	0.1773	386.144	47.1401	2.56845	8.44077	0.0913615	1.65419	681.997	689.841	0.752719	6.5e-06	23.8018	0.745958	0.511832	5e-06	0.183869	0.511808	-15.6933	0.282386	1.9e-06	0.00787384	0.282383	-13.3096
15NL09-1	Leucogranite	16.7	533.695	107.718	11.63	0.2462	216.545	167.525	21.3912	101.949	0.353486	15.3851	902.046	869.029	0.755443	7e-06	3.75696	0.754552	0.511891	4.5e-06	0.126786	0.511877	-14.4259
15NL10-1-1	Leucogranite	15.5	108.123	13.6838	2.75602	0.1048	199.918	209.335	5.31757	27.1391	0.207969	3.05382	755.855	766.312	0.755174	6e-06	2.77564	0.754563	0.511844	4e-06	0.118396	0.511832	-15.3369	0.282202	1.9e-06	0.00970878	0.282199	-19.9107
15NL10-1-2	Leucogranite	15.5	116.408	12.457	2.17038	0.0863	199.918	209.335	5.29005	26.1187	0.253773	3.40409	762.216	759.86	0.755004	5.5e-06	2.77559	0.754393						0.28223	2e-06	0.010628	0.282227	-18.9441
15NL4-1-1	Leucogranite	16	21.7228	2.00565	1.50711	0.1735	224.468	37.9979	1.21005	3.80796	0.112632	0.9	654.827	662.079	0.751697	6e-06	17.1633	0.747797	0.51189	4e-06	0.192013	0.51187	-14.5848	0.282305	2.3e-06	0.0178413	0.282299	-16.3604
15NL4-1-2	Leucogranite	16	67.8367	6.91524	2.72426	0.1766	266.541	89.8541	3.29114	12.7867	0.205866	2.4	731.369	727.124	0.75889	7e-06	8.62459	0.75693	0.511861	5.5e-06	0.155528	0.511845	-15.076	0.282273	1.7e-06	0.0122288	0.282269	-17.4293
15NL4-2	Leucogranite	16	19.2968	1.40468	1.71235	0.1618	207.683	61.9886	0.895093	2.82643	0.107915	0.8	642.708	630.397	0.758852	7e-06	9.74097	0.756639	0.511893	5.5e-06	0.19136	0.511873	-14.5249	0.282297	2.3e-06	0.019231	0.282291	-16.6687
16YL04	Leucogranite	15	109.582	14.8627	2.46304	0.0818	240	227	6.16974	29	0.247735	3	754.312	770.953	0.754274	3.5e-06	3.07257	0.753401	0.511853	2.4e-06	0.128555	0.511837	-15.1301	0.28219	1.7e-06	0.0117727	0.282186	-20.3034
16YL21	Leucogranite	17	38.6263	4.1969	4.19088	0.1191	153	136	2.64273	8.3	0.400881	1.2	684.841	690.896	0.759022	3.5e-06	3.27093	0.758233	0.511865	3.7e-06	0.192395	0.511843	-15.078	0.282322	3.8e-06	0.047626	0.282307	-16.0835
16YL24	Leucogranite	17.6	65.28	10.09	5.98	0.1648	535	70	3.17	12	0.11	1.9	729.055	727.839	0.771546	3.8e-06	22.2489	0.765985	0.511888	2.1e-06	0.159624	0.511869	-14.5554	0.282276	1.4e-06	0.00825371	0.282273	-17.2514
16YL25	Leucogranite	17.6	73.3035	12.1735	5.88637	0.16	400.177	97.5281	3.70466	15	0.133737	2.5	731.726	733.274					0.511907	2.5e-06	0.149237	0.51189	-14.1517	0.282276	2.3e-06	0.00762645	0.282274	-17.237
16YL26	Leucogranite	17.6	67.4074	11.0455	7.20281	0.134	410.471	71.2874	3.04872	12	0.100388	2.4	729.069	725.895					0.511912	2.3e-06	0.153517	0.511895	-14.0579	0.282333	1.8e-06	0.0059632	0.282331	-15.2018
16YL27	Leucogranite	17.6	61.7102	8.917	7.48064	0.1685	358.396	75.1146	2.64431	10	0.103185	2.3	721.983	707.056					0.511904	1.9e-06	0.159784	0.511886	-14.2261	0.282324	1.6e-06	0.00639584	0.282322	-15.5181
17YL15	Leucogranite	20	67.5038	9.89468	7.06432	0.16	425	74	4.05202	16	0.113966	2.3	726.197	744.512	0.74966	4.9e-06	16.6831	0.744921	0.511842	2e-06	0.153028	0.511822	-15.4247	0.282365	1.8e-06	0.00706411	0.282362	-14.0557
17YL20	Leucogranite	15	26.3451	1.705	2.74166	0.2182	340	15	1.24558	2.9	0.107541	1.6	657.515	620.07	0.762158	2.9e-06	65.9235	0.748115	0.511862	4.1e-06	0.259534	0.511837	-15.2543	0.282255	1.9e-06	0.00958218	0.282253	-18.0429
17YL22	Leucogranite	20	30.3701	3.31434	10.7072	0.1788	256	30	1.41466	3.7	0.200264	1.4	667.725	639.722	0.744519	4.7e-06	24.7753	0.737481	0.511864	4.9e-06	0.231032	0.511834	-15.1789	0.282305	2e-06	0.0203932	0.282298	-16.3325
17YL25	Leucogranite	15	71.7083	7.5204	2.81312	0.1039	192	103	3.80009	14	0.205582	2.5	749.551	773.041	0.752139	3.2e-06	5.41613	0.750986	0.51184	2e-06	0.164016	0.511824	-15.4987	0.282203	1.7e-06	0.0117234	0.2822	-19.8925
17YL32	Leucogranite	15	30.3179	2.04718	2.06126	0.155	163	101	1.43137	4.3	0.171683	1.3	676.108	664.367	0.760591	3.7e-06	4.69301	0.759591	0.511852	2.9e-06	0.201142	0.511833	-15.3357	0.28229	1.7e-06	0.0188275	0.282284	-16.9214
17YL33	Leucogranite	15	18.2632	1.02907	1.35011	0.1848	219	78	0.872228	2.4	0.145972	0.8	632.262	612.055	0.750689	3.4e-06	8.15667	0.748952	0.511897	4e-06	0.219603	0.511875	-14.499	0.282291	1.6e-06	0.026013	0.282284	-16.9325
17YL37	Leucogranite	15	33.3129	6.06407	5.82738	0.1273	283	71	2.29804	7.2	0.149621	1.5	681.18	699.395	0.752865	3.5e-06	11.582	0.750397	0.511822	3.1e-06	0.192862	0.511803	-15.9129	0.282261	2.9e-06	0.0142204	0.282257	-17.8731
NY12-2	Leucogranite	15	44.2	4.7	1.9	0.19	255	99	2.22	10	0.13	1.4	697.066	706.865	0.756917	4.7e-06	7.48745	0.755322	0.511851	2.2e-06	0.134145	0.511838	-15.2367	0.28225	1.2e-06	0.0132381	0.282246	-18.2559
NY12-3	Leucogranite	15	32.7	3.4	1.6	0.16	250	70	1.71	6.1	0.11	1.7	679.143	683.257	0.759082	4.8e-06	10.384	0.75687	0.511851	2e-06	0.16939	0.511835	-15.2944	0.282264	1.4e-06	0.00922473	0.282262	-17.721
NY15-3	Leucogranite	17.6	40.8	8	5.3	0.15	400	86	2.46	10	0.09	1.4	691.393	712.104	0.763344	3.9e-06	13.529	0.759963	0.511887	2.5e-06	0.148647	0.51187	-14.5366	0.282336	1.2e-06	0.00916483	0.282333	-15.1542
NY15-4	Leucogranite	17.6	62.7	11.3	7.6	0.15	400	80	2.99	13	0.1	2.5	722.968	729.853	0.768169	4.2e-06	14.5505	0.764533	0.511862	1.8e-06	0.138979	0.511846	-15.0123	0.282353	1.8e-06	0.00570256	0.282351	-14.5163
aεNd(t) = (143Nd/144Ndsample/143Nd/144NdCHUR − 1) × 10000, 143Nd/144NdCHUR = 0.512638.
bεHf(t) = (176Hf/177Hfsample/176Hf/177HfCHUR − 1) × 10000, 176Hf/177HfCHUR = 0.282772.
